# Supplementary material for: Zein/Polysaccharide Nanoscale Electrostatic Complexes: Preparation, Drug Encapsulation and Antibacterial Properties
Source: MDPI journal article supplement (doi:10.3390/nano14020197), 2024-01-15
Supplement: s1 [file s1]

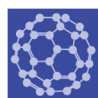

## Supplementary Materials

# Zein/Polysaccharide Nanoscale Complexes: Preparation, Drug Encapsulation and Antibacterial Properties

Elena-Daniela Lotos,<sup>1</sup> Marcela Mihai,<sup>1,\*</sup> Ana-Lavinia Vasiliu,<sup>1</sup> Irina Rosca,<sup>1</sup> Alice Mija,<sup>2</sup> Bogdan C. Simionescu,<sup>1</sup> Stergios Pispas<sup>1,3,\*</sup>

<sup>1</sup>Petru Poni Institute of Macromolecular Chemistry, 41A Grigore Ghica Voda Alley, 700487, Iasi, Romania

<sup>2</sup>Université Côte d'Azur, Institut de Chimie de Nice, UMR CNRS 7272, 28 Av Valrose, Nice, France

<sup>3</sup>Theoretical and Physical Chemistry Institute, National Hellenic Research Foundation, 48 Vassileos Constantinou Ave, 11635 Athens, Greece

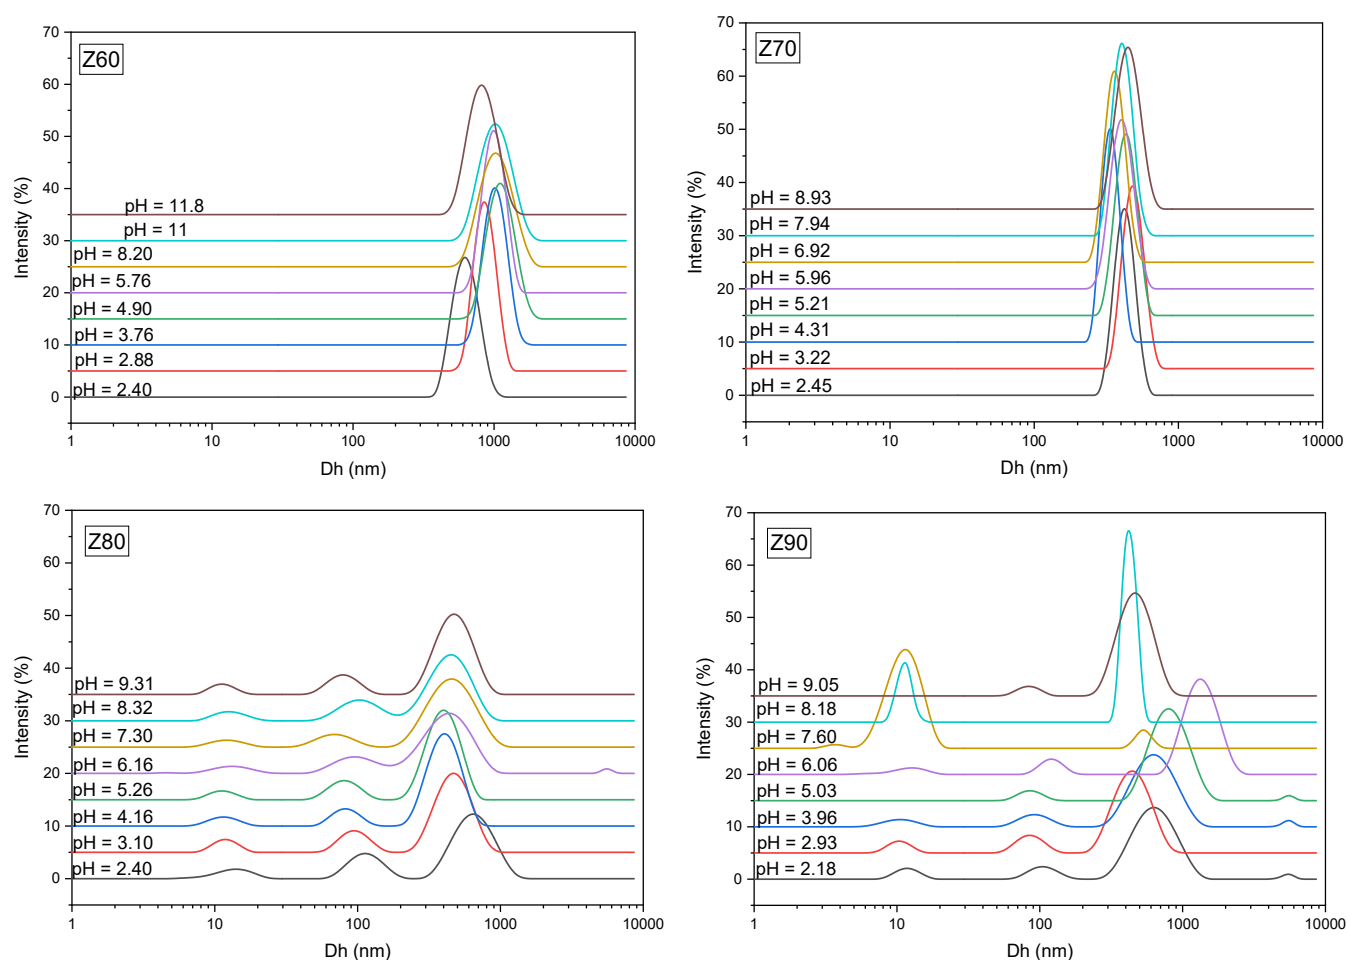

**Figure 1S.** Size distributions by DLS of zein protein at different alcohol-water mixtures and different pH values. Zxx in the upper left inset denotes the alcohol % content of the solvent mixture.

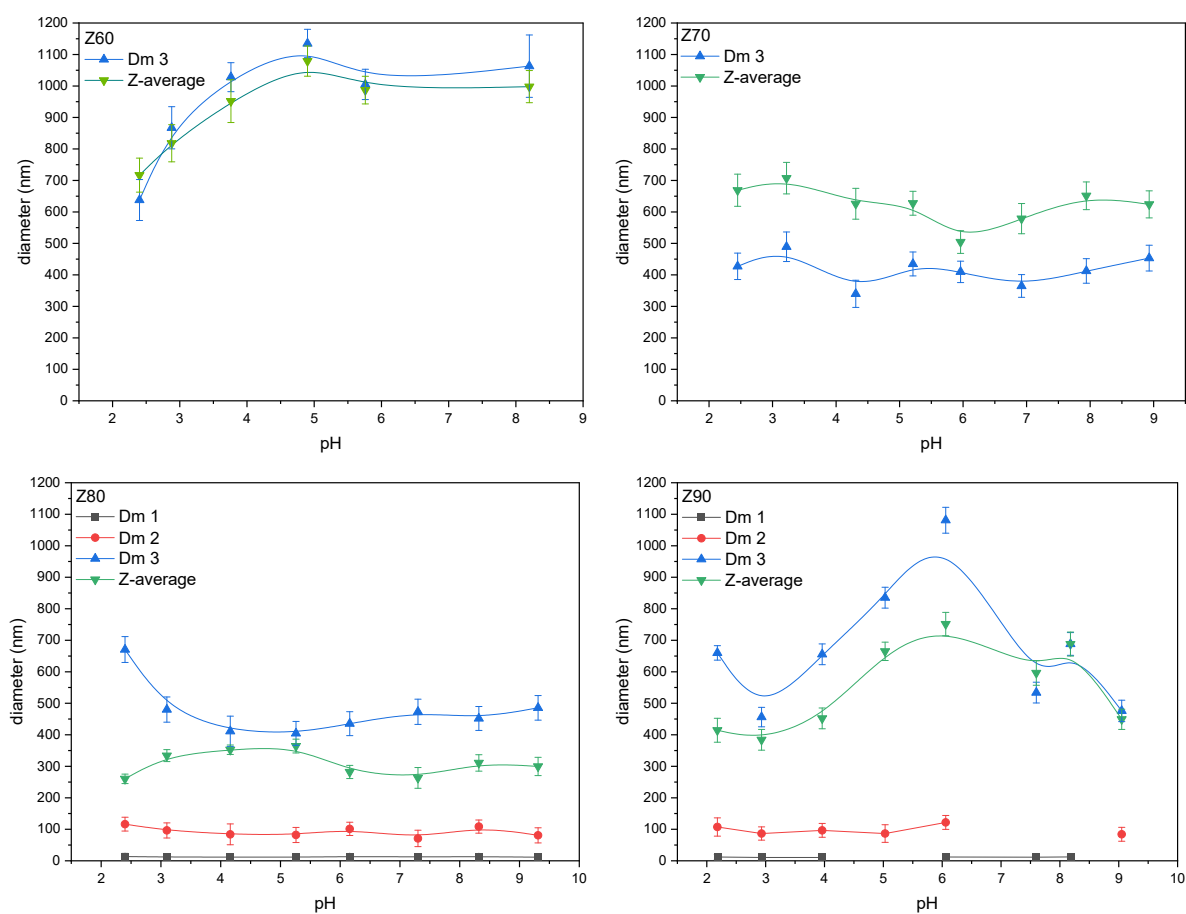

**Figure 2S.** Variation of aggregate size in zein solutions at different alcohol-water mixing ratios and pH values from DLS experiments. Z-average is the peak position size of the aggregates from cumulant analysis. Dm is the diameter of each aggregate population observed in each sample. Dm 3 is the mean diameter of the peak ascribed to the largest size aggregates for each sample. Error bars were calculated based on three independent measurements.

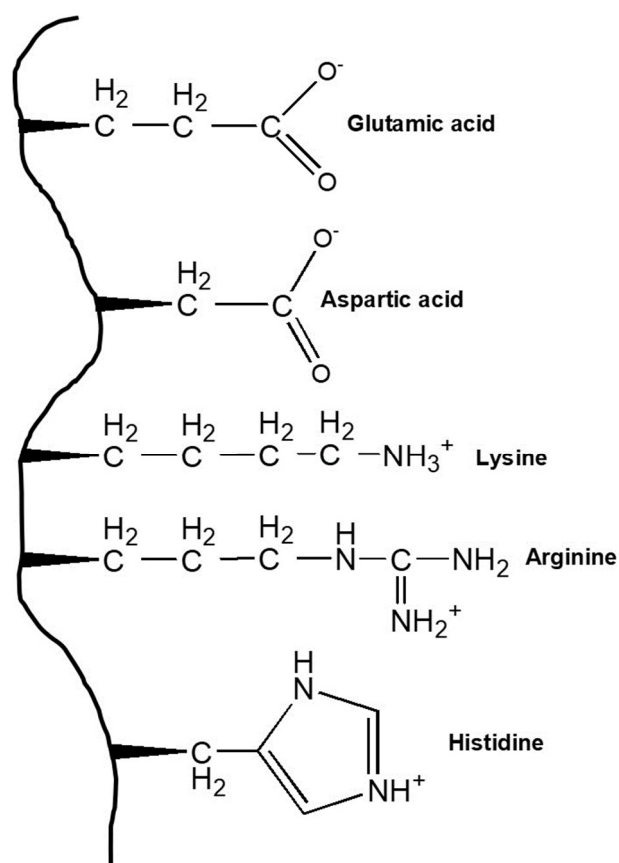

**Figure 3S.** Acidic and basic amino acids in zein.

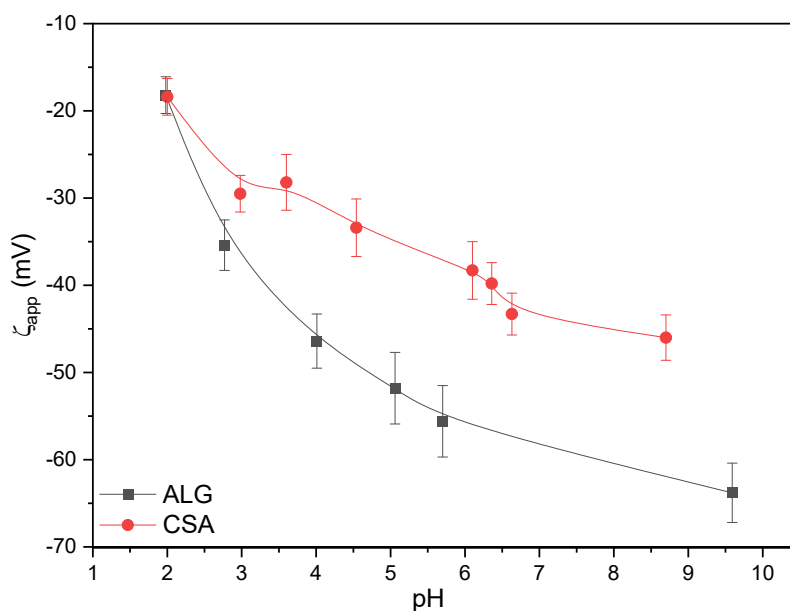

**Figure 4S.**  $\zeta_{app}$  vs pH for the two polysaccharides utilized in this study, sodium alginate (ALG) and chondroitin sulfate (CSA). Error bars were calculated based on three independent measurements.

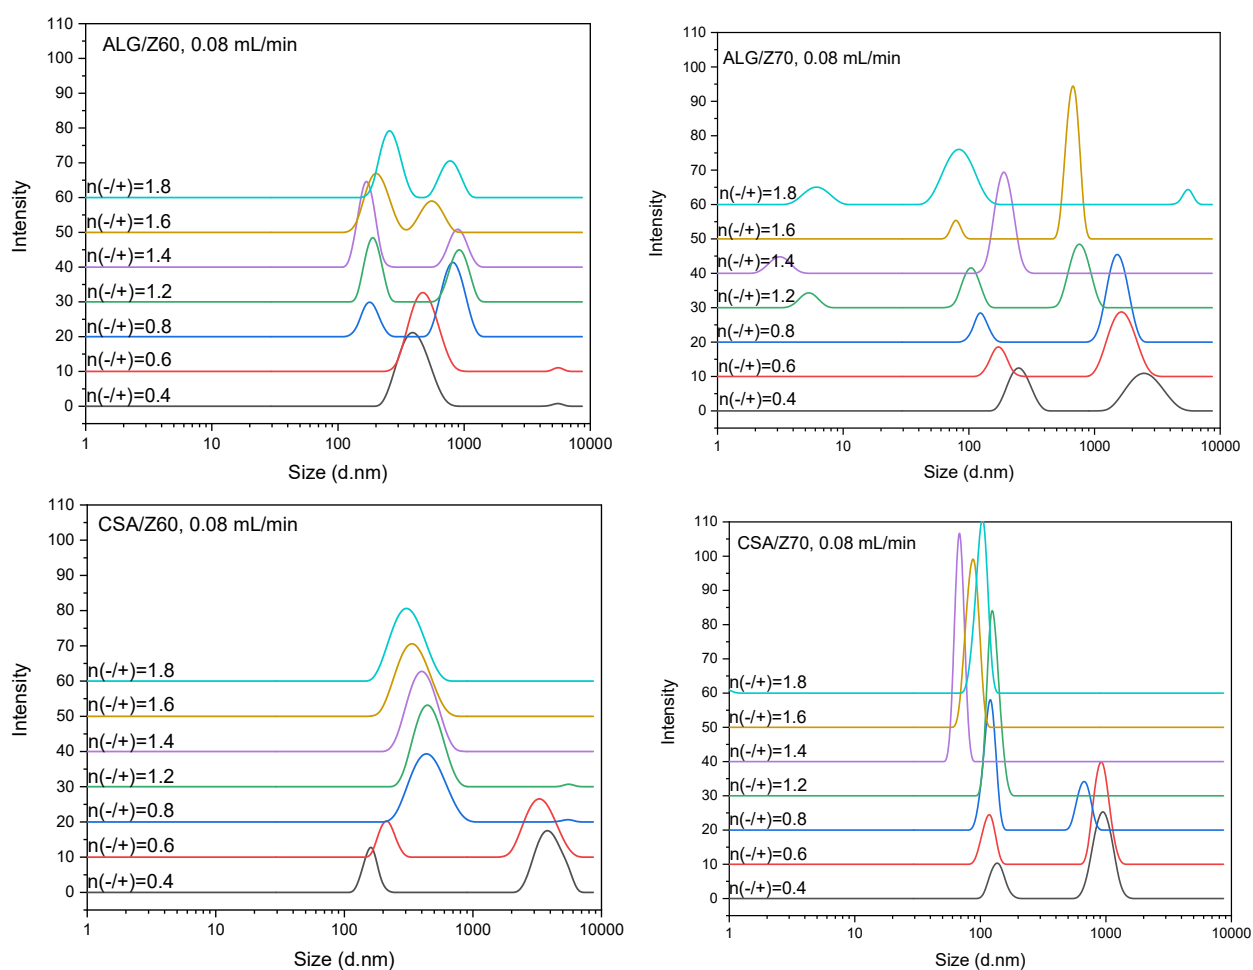

**Figure 5S.** Size distributions from DLS for zein/polysaccharide complexes at different solvent mixtures and different charge,  $n(-/+)$ , ratios. Conditions: PZ solution added to zein solution, addition rate 0.08 mL/min. The presence of monomodal size distributions for zein/CSA complexes at higher  $n(-/+)$  is observed.

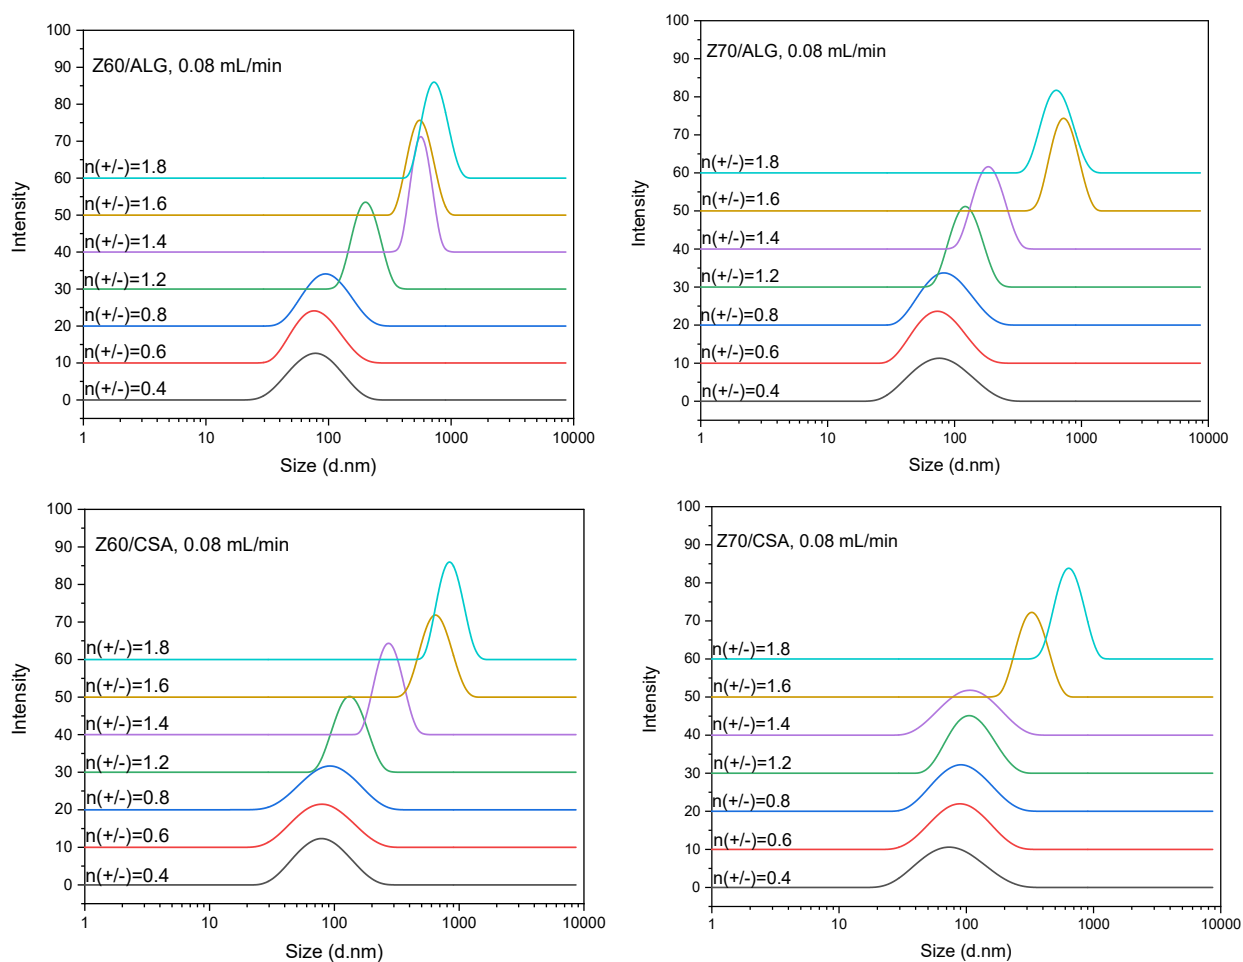

**Figure 6S.** Size distributions from DLS for zein/polysaccharide complexes at different solvent mixtures and different charge,  $n(+/-)$ , ratios. Conditions: zein solution added to PZ solutions, addition rate 0.08 mL/min. The presence of monomodal size distributions for all zein/PZ complexes is notable. Larger sizes, close to micron range, are obtained at higher  $n(+/-)$  ratios.

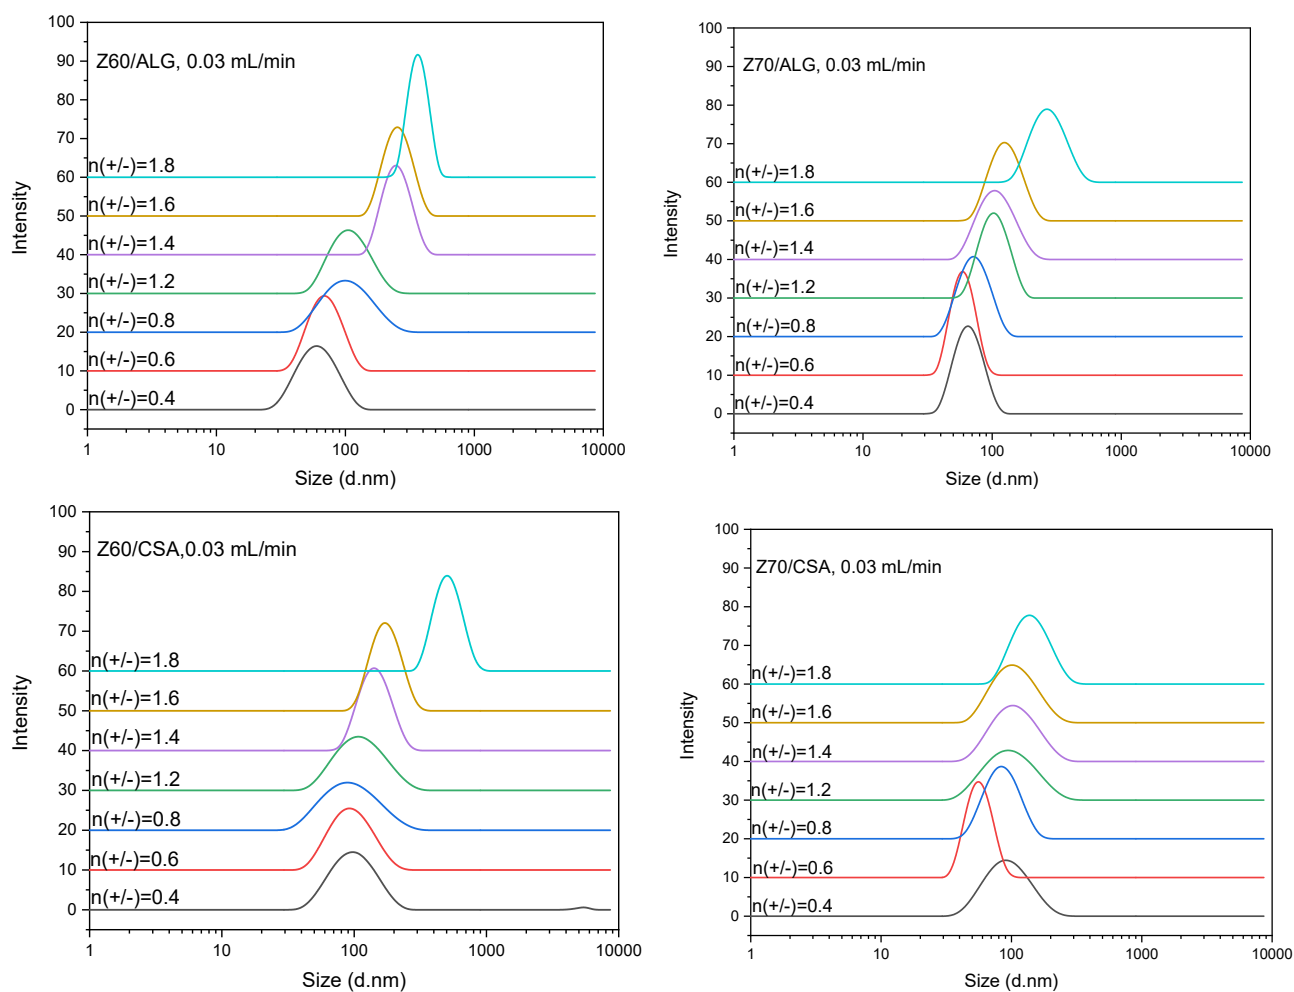

**Figure 7S.** Size distributions from DLS for zein/polysaccharide complexes at different solvent mixtures and different charge,  $n(+/-)$ , ratios. Conditions: zein solution added to PZ solutions, addition rate 0.03 mL/min. The presence of monomodal size distributions for all zein/PZ complexes should be noted. Smaller sizes are obtained at this addition rate.

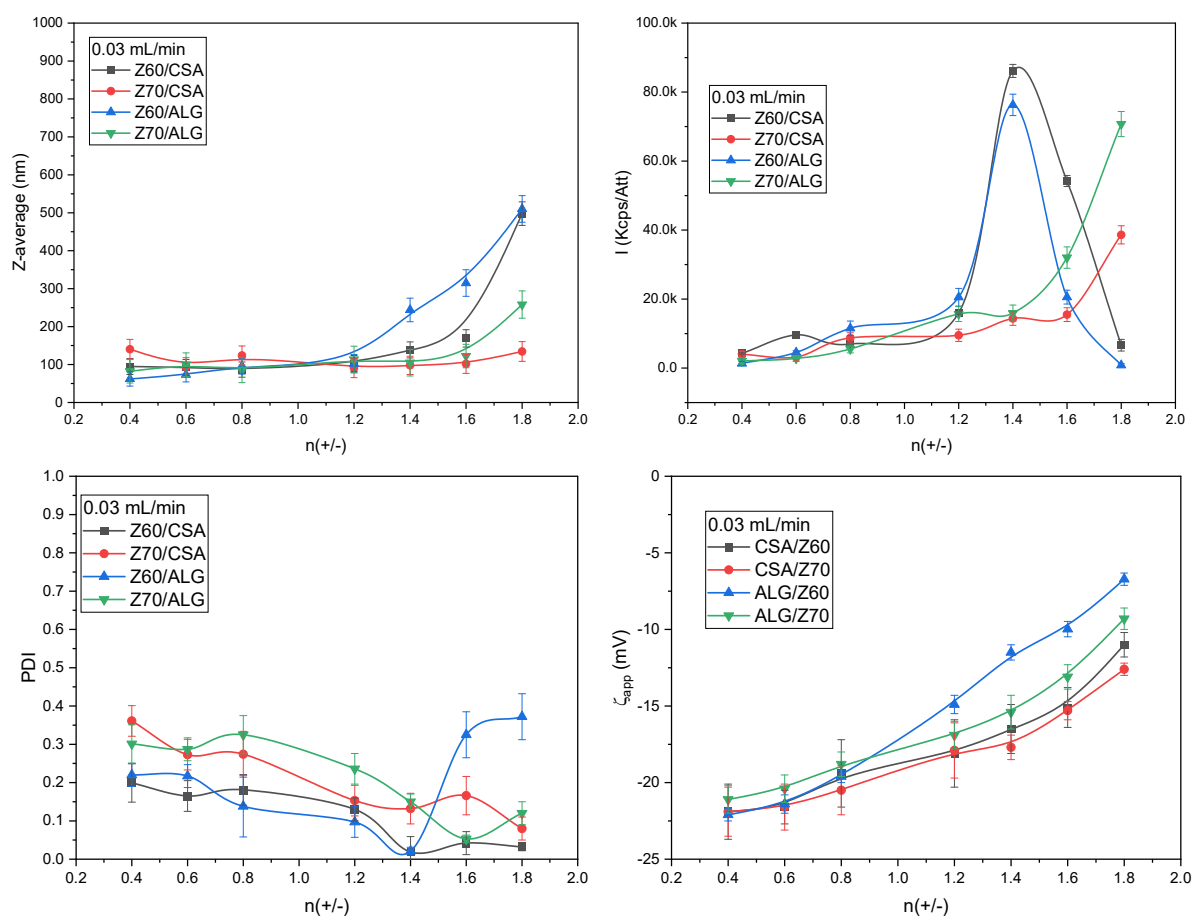

**Figure 8S.** Variation of size ( $D_h$ -average), light scattering intensity ( $I$ ), size polydispersity index (PDI) and zeta potential ( $\zeta_{app}$ ) with  $n(+/-)$  for different zein/PZ complexes formed under different solvent and mixing conditions, for the addition rate of 0.03 mL/min. Error bars were calculated based on three independent measurements.

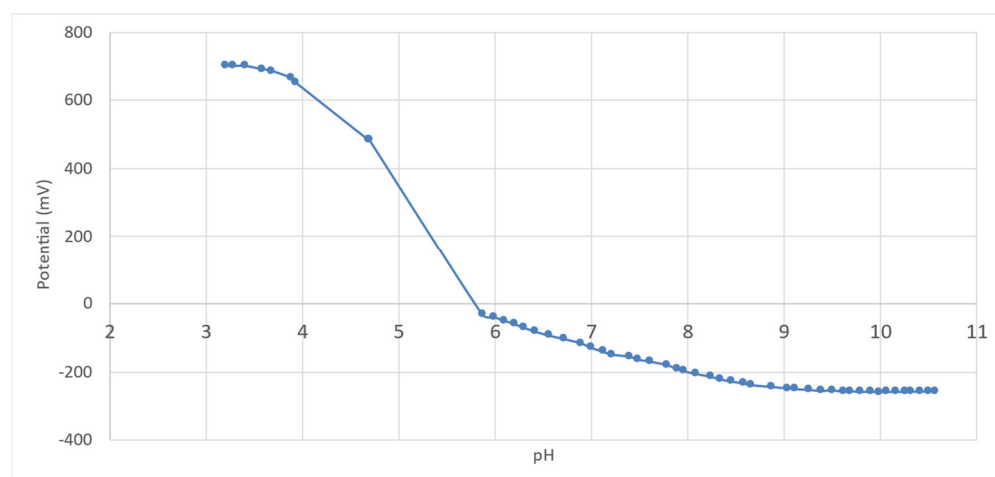

**Figure 9S.** Potentiometric titration of ciprofloxacin vs pH

**Table 1S.** Literature data as compared with the results obtained in this work considering the materials performances as concern the inhibition zone against the reference strains

| Inhibition zone |             | Reference                                                                                                     |
|-----------------|-------------|---------------------------------------------------------------------------------------------------------------|
| S. aureus       | E. coli     |                                                                                                               |
| 20              | 19          | <a href="https://doi.org/10.1002/jbm.b.31615">https://doi.org/10.1002/jbm.b.31615</a>                         |
| 22              | 26          | <a href="https://doi.org/10.3390/pathogens5010028">https://doi.org/10.3390/pathogens5010028</a>               |
| 10              | 11          | <a href="https://doi.org/10.1080/16878507.2020.1748941">https://doi.org/10.1080/16878507.2020.1748941</a>     |
| 12              | 18          | <a href="https://doi.org/10.1080/14756360310001624948">https://doi.org/10.1080/14756360310001624948</a>       |
| 21              | 22          | <a href="https://doi.org/10.1021/acsmmedchemlett.5b00146">https://doi.org/10.1021/acsmmedchemlett.5b00146</a> |
| 9.3             | 19.8        | <a href="https://doi.org/10.1007/s00284-012-0094-7">https://doi.org/10.1007/s00284-012-0094-7</a>             |
| <b>21.3</b>     | <b>25.1</b> | <b>NWM + CF/(Z70/ALG)0.8 =9 - this work</b>                                                                   |
| <b>20.1</b>     | <b>27.7</b> | <b>NWM + CF/(Z70/CSA)0.8 =9 - this work</b>                                                                   |
